# Supplementary material
Source: PubMed Central journal article supplement (PMC3624589)
Supplement: JB.02205-12_zjb999092564so1.pdf [file JB.02205-12_zjb999092564so1.pdf]

|        |                                                               |     |
|--------|---------------------------------------------------------------|-----|
| PA2449 | MRIHVSFIDRVGITQEVLLALLGGRNLNLDAVEM---VPPNVYIDAPTLSPVLEELRAAL  | 57  |
| PhhR   | MRIKVHCQNRVGIIRDILNLLVDYGINVNRGEVGGDQGNAYLLCPNMINLQLOSLRPKL   | 60  |
| TyrR   | MRLEVFCEDRGLGTRELLDLLVLRGIDLRGIEI--DPIGRILYNFAELEFESFSSLMAEI  | 58  |
| PA2449 | LGIRGVQAMTVVDILPGORRLQLDALLAAMADPVLAVDGKGLVLLANPAFSERCGR---   | 114 |
| PhhR   | EAVPGVFGVKRVGLMPSEERRHLELNALLAALDFPVLSDVMGGQIVAAANRAAQLLGVVVD | 120 |
| TyrR   | RRRAGVTDVRTVPWMPSEEREHLALSALLEALPEPVLSDVMKSKVDMANPASCQLFGOKLD | 118 |
| PA2449 | DPAGERLASLFDDETLEDALVEQGFRLPLREVTFMGQALLDATP-ITEGPGEGERHLAG   | 173 |
| PhhR   | EVPGIPLSRYVEDLDLPELVRANKARINGLRVKVKGDFVLADIAP--LQSEHDESEALAG  | 178 |
| TyrR   | RLRNHTAAQLINGFNFLRWLESEPOQDSHNEHVVINGQNFLMEITPVYLOENDQ-HVLTG  | 177 |
| PA2449 | GLLTLVEPNRIGERLAALHHDHAEGFEMLLGDSQPIRTLKTRAORVAALDAPLLIHGETG  | 233 |
| PhhR   | AVLTLHRADRVGERIYHVRKQELRGFDSIFQSSRVMAAVVREARRMAPLDAPLLIEGETG  | 238 |
| TyrR   | AVVMRSTIRMGRLQONVAAQDVSAFSQIVAVSPKMKHVVEQAQKLAAPLLITGDTG      | 237 |
| PA2449 | TGKELVARGCHALSARHNSPFLALNCAALPENLAESELFQYAPGAFTGAQRGGKPGLEL   | 293 |
| PhhR   | TGKELLARACHLASPRGQSPFMALNCAGLPESMAETELFGYGFQAFEGARPEGKLGLEL   | 298 |
| TyrR   | TGKDLFAYACHQASPRAGKPYLALNCASIPEDAVESELFQHAP-----EGKKGFREQ     | 289 |
| PA2449 | AHQGTVFLDEIGEMSPYLQAKLLRFLSDGSFRRVGGDREVRVDVIRLSATHRNLEKMAE   | 353 |
| PhhR   | TAGGTLFLDGVGEMSPRLQAKLLRFLQDGCFRVGSDEEVLDVVRVICATQVDLSELCAK   | 358 |
| TyrR   | ANGGSVLLDEIGEMSPRMQAKLLRFLNDGTFRRVGEDHEVHVDVVRVICATQKNLVELVQK | 349 |
| PA2449 | GSFREDLFYRLNVLSLEVPPLRERGHDIILLARHFMOQACAQIQRPVCR LAPGTYPALLS | 413 |
| PhhR   | GEFRQDLYHRLNVLSLHIPPPLRECLDGLAPLAEHFLDQASRQIGCGLPKLSAQALERLER | 418 |
| TyrR   | GMFREDLYYRLNVLTNLNPLRDCPDIMPLTELFVARFADEQGVPRPKLAADLNTVLR     | 409 |
| PA2449 | NRWPGNVRQLQNVIFRAAAICSSLVLDIGDLEIAGTAVARQNDGE---VGSLEEAVEGF   | 470 |
| PhhR   | YHWPGNVRQLENVLFQAVSLCEGGTVKAEHIRLPDYGAP-QPLGDFSLEGDLDAIVGRFE  | 477 |
| TyrR   | YAWPGNVRQLKNAIYRALTQLDGYELRPQDILLPDYDAATVAVGEDAMEGLSDEITSRFE  | 469 |
| PA2449 | KALLEKLYVSYSTRQLAARLQTSHTAIAHRLRKYGIGPRA---                   | 511 |
| PhhR   | KAVLERLFREHPSSRQLGKRLGVSHHTAANKLRQHGVGQSEG--                  | 519 |
| TyrR   | RSVLTQLYRNYPSTRKLAKRLGVSHHTAIAANKLREYGLSQKNEE                 | 513 |

**FIG S1** Alignment of PA2449 of *P. aeruginosa* PAO1 with PhhR (*P. aeruginosa* PAO1) and TyrR (*E. coli*). Proteins were aligned using Clustal X 2.1 with default settings. The predicted RpoN-interaction domains are overlaid with a heavy bar. A ~ 8 amino acid residue stretch (enclosed by a rectangle) is conserved in both PA2449 and PhhR but not TyrR.

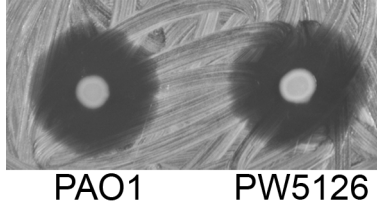

**FIG S2** Killing of *S. aureus* ATCC 25923 by a transposon-insertion PA2449 mutant of *P. aeruginosa* PAO1 (PW5126). Strains were grown in peptone broth at 37 °C to an OD<sub>600</sub> of 0.7. Cultures were spotted onto LB plates that were freshly swabbed with *S. aureus*. As shown, there were no differences in the killing of *S. aureus* between both strains following a 24 h incubation at 37 °C.

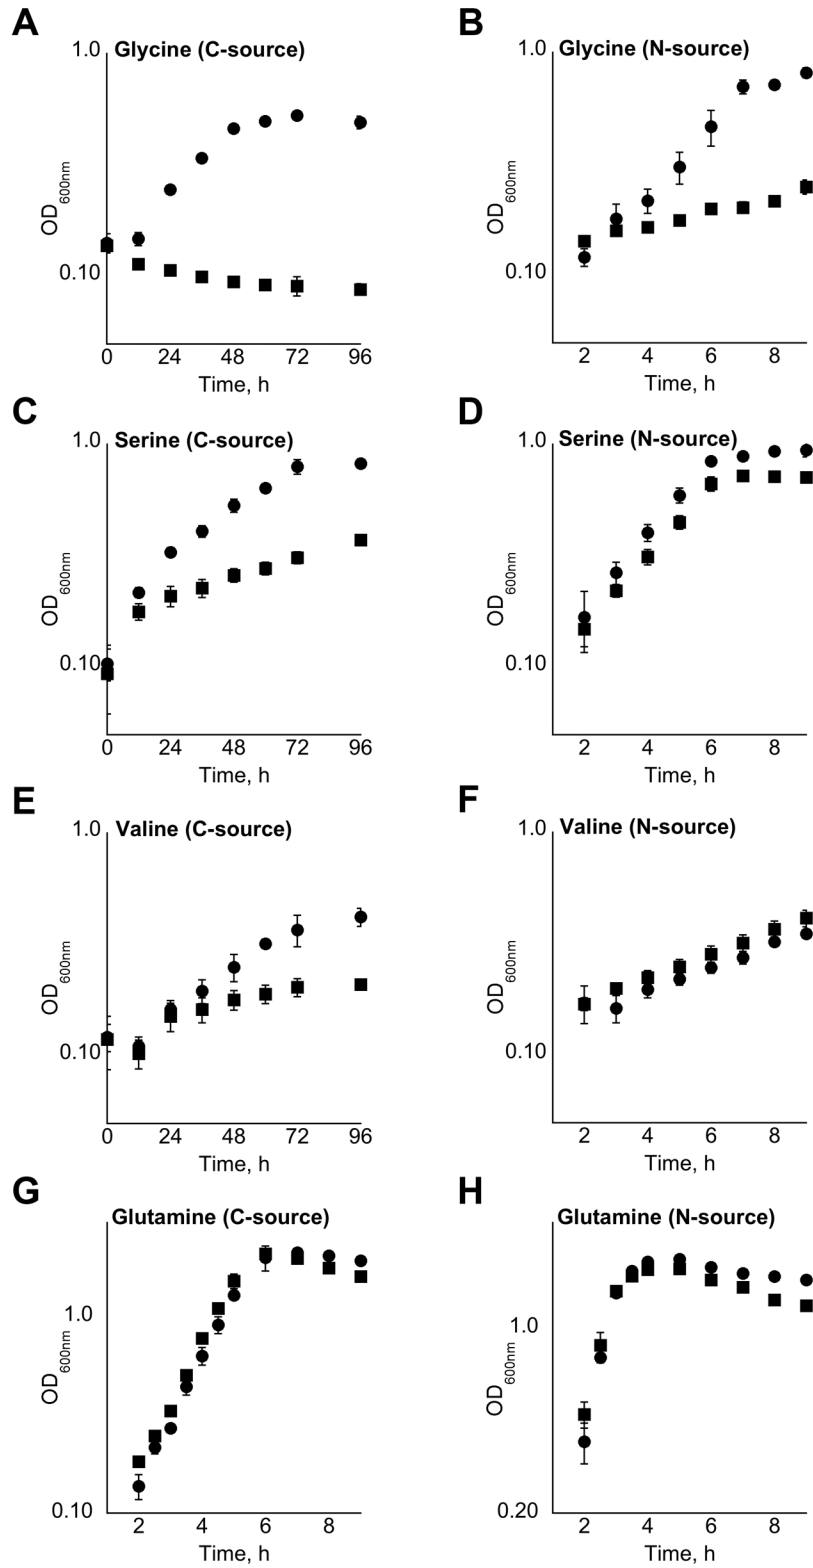

**FIG S3** *P. aeruginosa* PAO1 (circles) and PW5126 (squares) were grown with indicated amino acids as sole sources for carbon (C-source) or nitrogen (N-sources).

**TABLE S1** The strains used in this study were obtained from the *P. aeruginosa* PAO1 transposon mutant library (1).

|                      | <b>Strain</b> | <b>Relevant genotype</b>      |
|----------------------|---------------|-------------------------------|
| <i>P. aeruginosa</i> | PAO1-UW       | wild-type                     |
|                      | PW1069        | PA0049-E09::ISphoA/hah        |
|                      | PW1205        | PA0122-A06::ISlacZ/hah        |
|                      | PW4738        | <i>hcnB</i> -D07::ISlacZ/hah  |
|                      | PW5112        | <i>gcvT2</i> -G08::ISlacZ/hah |
|                      | PW5114        | <i>sdaA</i> -G08::ISlacZ/hah  |
|                      | PW5121        | <i>gcvH2</i> -G02-ISlacZ/hah  |
|                      | PW5126        | PA2449-E03::ISphoA/hah        |
|                      | PW5183        | <i>mexF</i> -B02::ISphoA/hah  |

**TABLE S2** Plasmids generated and used in this study. Plasmids either encode for tetracycline (Tc<sup>R</sup>), kanamycin (Km<sup>R</sup>) or gentamicin (Gm<sup>R</sup>) resistance.

| <b>Plasmid</b> | <b>Characteristics</b>                               | <b>Source</b> |
|----------------|------------------------------------------------------|---------------|
| pBBR1MCS-5     | Broad-host range expression plasmid; Gm <sup>R</sup> | (2)           |
| pUCP-A2G2      | <i>phzA2B2C2D2E2F2G2</i> in pUCP26; Tc <sup>R</sup>  | (3)           |
| pCR®-Blunt     | <i>E. coli</i> cloning plasmid; Km <sup>R</sup>      | Invitrogen    |
| pET28b         | <i>E. coli</i> expression plasmid                    | Novagen       |
| pBRL407        | <i>metE-lacZ</i> fusion in pCR®-Blunt                | This study    |
| pBRL408        | PA2449 in pCR®-Blunt                                 | This study    |
| pBRL409        | <i>E. coli metE</i> in pCR®-Blunt                    | This study    |
| pBRL410        | <i>E. coli lacZ</i> with RBS in pCR®-Blunt           | This study    |
| pBRL411        | <i>phzB1</i> promoter in pCR®-Blunt                  | This study    |
| pBRL413        | <i>phzA2B2C2D2E2F2G2</i> in pBBR1MCS-5               | This study    |
| pBRL415        | <i>metE-lacZ</i> fusion in pBBR1MCS-5                | This study    |
| pBRL416        | <i>E. coli lacZ</i> with RBS in pBBR1MCS-5           | This study    |
| pBRL417        | PA2449 ORF in pET28b                                 | This study    |
| pBRL418        | <i>phzB1</i> promoter in pBRL416                     | This study    |
| pBRL420        | <i>phzB2</i> promoter in pCR®-Blunt                  | This study    |
| pBRL421        | <i>phzM</i> promoter in pCR®-Blunt                   | This study    |
| pBRL422        | <i>phzH</i> promoter in pCR®-Blunt                   | This study    |
| pBRL423        | <i>phzB2</i> promoter in pBRL416                     | This study    |
| pBRL424        | <i>phzM</i> promoter in pBRL416                      | This study    |
| pBRL425        | <i>phzH</i> promoter in pBRL416                      | This study    |
| pBRL435        | RBS-PA2449 in pBBR1MCS-5                             | This study    |
| pBRL439        | <i>hcnA-lacZ</i> fusion in pCR®-Blunt                | This study    |
| pBRL447        | <i>hcnA-lacZ</i> fusion in pBBR1MCS-5                | This study    |
| pBRL453        | <i>gcvP2-lacZ</i> fusion in pCR®-Blunt               | This study    |
| pBRL456        | <i>gcvP2-lacZ</i> fusion in pBBR1MCS-5               | This study    |
| pBRL480        | <i>E. coli metE</i> in pBBR1MCS-5                    | This study    |

**TABLE S3** Oligonucleotides used in this study. Identifiers and sequences for each oligonucleotide are given. Restriction sites used for cloning purposes are shown in *italics*. Oligonucleotides used for generating fusion constructs between the *E. coli lacZ* ORF with the ‘DNA of interest’ are marked as “fusion” in the **Notes** column.

| Identifier | Sequence                                        | Gene Target         | Notes           |
|------------|-------------------------------------------------|---------------------|-----------------|
| WT01.f     | gcagcatatgcgcatccacgtctccttcat                  | PA2449 ORF          | <i>Nde</i> I    |
| WT02.r     | gcaggaattcgcaagccggtgtattccagcg                 | PA2449 ORF          | <i>EcoR</i> I   |
| BL343.f    | ttaggcctgaatgccggtg                             | <i>rplU</i>         | –               |
| BL343.r    | atgtacgcagtgattgttaccg                          | <i>rplU</i>         | –               |
| BL393.f    | gacggtagcaagaaggagatatacatgacctgattacggattcactg | <i>E. coli lacZ</i> | <i>Kpn</i> I    |
| BL393.r    | gacaagcttgacagttattttgacaccagaccaactggta        | <i>E. coli lacZ</i> | <i>Hind</i> III |
| BL394.f    | gacgcatgagcctgttccagagccttttc                   | <i>phzB1</i>        | <i>Sph</i> I    |
| BL394.r    | gacggtagcagattggattgtcgtatcagggcat              | <i>phzB1</i>        | <i>Kpn</i> I    |
| BL396.f    | gttctccagtagacaacgacaacag                       | <i>metE</i>         | fusion          |
| BL396.r    | gaatccgtaatcatggatcattgggtgttctccagtcgaaagg     | <i>metE</i>         | fusion          |
| BL398.f    | gacgcatgagcctgtcaactgaatcgac                    | <i>phzB2</i>        | <i>Sph</i> I    |
| BL398.r    | gacggtagcaggaatggcattatcgagcat                  | <i>phzB2</i>        | <i>Kpn</i> I    |
| BL399.f    | gacgcatgaggttagatgtcattcaagtggg                 | <i>phzM</i>         | <i>Sph</i> I    |
| BL399.r    | gacggtagccttttattctctctcgttacacatttc            | <i>phzM</i>         | <i>Kpn</i> I    |
| BL400.f    | gacgcatgagtcgaacgttgccacgaaatc                  | <i>phzH</i>         | <i>Sph</i> I    |
| BL400.r    | gacggtagcagggaaactcctataattgatgtttatc           | <i>phzH</i>         | <i>Kpn</i> I    |
| BL408.f    | gacctgcaacaccgacaag                             | <i>hcnA</i>         | fusion          |
| BL408.r    | gaatccgtaatcatggatcattgccctttcatccgtgagag       | <i>hcnA</i>         | fusion          |
| BL427.f    | atgacctgattacggattcactg                         | <i>E. coli lacZ</i> | fusion          |
| BL427.r    | gcagttattttgacaccagaccaactggta                  | <i>E. coli lacZ</i> | fusion          |
| BL429.f    | ctgcagttctgcccgcagtg                            | <i>gcvP2</i>        | fusion          |
| BL429.r    | gaatccgtaatcatggatcattgacgggatcctcagggcgtc      | <i>gcvP2</i>        | fusion          |

**TABLE S4** Complete list of genes having > 2-fold change in transcript levels in a transposon-insertion PA2449 mutant compared to wild-type *P. aeruginosa* PAO1 grown in peptone broth. Fold-changes represent mean values  $\pm$  standard deviation (SD). Gene ID, name and descriptions are based on information available from ([www.pseudomonas.com](http://www.pseudomonas.com)).

| Gene ID | Gene name    | Fold-change ( $\pm$ SD) | Description                                           |
|---------|--------------|-------------------------|-------------------------------------------------------|
| PA0048  |              | - 3.56 $\pm$ 0.45       | probable transcriptional regulator                    |
| PA0049  |              | - 10.3 $\pm$ 3.04       | hypothetical protein                                  |
| PA0050  |              | - 2.75 $\pm$ 0.35       | hypothetical protein                                  |
| PA0052  |              | - 3.41 $\pm$ 1.01       | hypothetical protein                                  |
| PA0059  | <i>osmC</i>  | - 4.66 $\pm$ 1.16       | osmotically inducible protein                         |
| PA0105  | <i>coxB</i>  | - 2.64 $\pm$ 0.25       | cytochrome c oxidase, subunit II                      |
| PA0106  | <i>coxA</i>  | - 3.00 $\pm$ 0.61       | cytochrome c oxidase, subunit I                       |
| PA0107  |              | - 2.62 $\pm$ 0.28       | hypothetical protein                                  |
| PA0108  | <i>collI</i> | - 2.64 $\pm$ 0.52       | cytochrome c oxidase, subunit III                     |
| PA0110  |              | - 2.66 $\pm$ 0.62       | hypothetical protein                                  |
| PA0111  |              | - 2.52 $\pm$ 0.23       | hypothetical protein                                  |
| PA0112  |              | - 2.39 $\pm$ 0.33       | hypothetical protein                                  |
| PA0113  |              | - 2.17 $\pm$ 0.09       | probable cytochrome c oxidase assembly factor         |
| PA0122  | <i>rahU</i>  | - 29.7 $\pm$ 15.5       | protein affecting pleiotropic properties              |
| PA0144  |              | - 2.86 $\pm$ 0.50       | hypothetical protein                                  |
| PA0355  | <i>pfpl</i>  | - 4.88 $\pm$ 1.78       | protease                                              |
| PA0431  |              | - 2.74 $\pm$ 0.63       | hypothetical protein                                  |
| PA0432  | <i>sahH</i>  | - 3.34 $\pm$ 0.35       | S-adenosyl-L-homocysteine hydrolase                   |
| PA0450  |              | 2.69 $\pm$ 0.36         | probable phosphate transporter                        |
| PA0546  | <i>metK</i>  | - 5.04 $\pm$ 1.84       | methionine adenosyltransferase                        |
| PA0547  |              | - 4.34 $\pm$ 1.03       | probable transcriptional regulator                    |
| PA0674  | <i>vreA</i>  | 2.33 $\pm$ 0.17         | TonB-related protein                                  |
| PA0676  | <i>vreR</i>  | 2.34 $\pm$ 0.32         | sigma factor regulator                                |
| PA0681  | <i>hxcT</i>  | 3.82 $\pm$ 1.07         | pseudopilin                                           |
| PA0682  | <i>hxcH</i>  | 2.85 $\pm$ 0.68         | pseudopilin                                           |
| PA0683  |              | 2.91 $\pm$ 0.72         | probable type II secretion system protein             |
| PA0684  |              | 2.93 $\pm$ 0.73         | probable type II secretion system protein             |
| PA0685  |              | 4.24 $\pm$ 1.62         | probable type II secretion system protein             |
| PA0686  |              | 3.05 $\pm$ 0.50         | probable type II secretion system protein             |
| PA0687  |              | 2.24 $\pm$ 0.25         | probable type II secretion system protein             |
| PA0688  |              | 2.56 $\pm$ 0.41         | probable binding protein component of ABC transporter |
| PA0690  |              | 2.40 $\pm$ 0.33         | hypothetical protein                                  |
| PA0691  |              | 3.06 $\pm$ 0.43         | hypothetical protein                                  |
| PA0692  |              | 3.71 $\pm$ 0.42         | hypothetical protein                                  |
| PA0693  | <i>exbB2</i> | 4.49 $\pm$ 0.58         | transport protein                                     |
| PA0694  | <i>exbD2</i> | 3.24 $\pm$ 0.46         | transport protein                                     |
| PA0695  |              | 2.87 $\pm$ 0.42         | hypothetical protein                                  |
| PA0696  |              | 4.34 $\pm$ 0.99         | hypothetical protein                                  |
| PA0697  |              | 4.03 $\pm$ 0.37         | hypothetical protein                                  |
| PA0698  |              | 4.06 $\pm$ 0.80         | hypothetical protein                                  |

|                     |              |               |                                                    |
|---------------------|--------------|---------------|----------------------------------------------------|
| PA0699              |              | 3.84 ± 0.64   | probable peptidyl-prolyl isomerase                 |
| PA0700              |              | 2.81 ± 0.54   | hypothetical protein                               |
| PA0701              |              | 2.97 ± 0.43   | probable transcriptional regulator                 |
| PA0744              |              | - 2.46 ± 0.53 | probable enoyl-CoA hydratase                       |
| PA0745              |              | - 2.81 ± 0.60 | probable enoyl-CoA hydratase                       |
| PA0746              |              | - 2.52 ± 0.19 | probable acyl-CoA dehydrogenase                    |
| PA0747              |              | - 2.56 ± 0.33 | probable aldehyde dehydrogenase                    |
| PA0802              |              | 2.84 ± 0.59   | hypothetical protein                               |
| PA0844              | <i>plcH</i>  | 2.45 ± 0.36   | hemolytic phospholipase C                          |
| PA0852              | <i>cpdD</i>  | - 7.46 ± 3.36 | chitin-binding protein                             |
| PA0958              | <i>oprD</i>  | - 2.46 ± 0.42 | basic amino acid/peptide outer membrane porin      |
| PA1130              | <i>rhIC</i>  | - 7.22 ± 1.15 | rhamnosyltransferase 2                             |
| PA1131              |              | - 3.42 ± 0.50 | probable major facilitator superfamily transporter |
| PA1211              |              | - 4.10 ± 1.23 | hypothetical protein                               |
| PA1212              |              | - 5.58 ± 1.98 | probable major facilitator superfamily transporter |
| PA1213              |              | - 6.91 ± 1.27 | hypothetical protein                               |
| PA1214              |              | - 6.64 ± 1.51 | hypothetical protein                               |
| PA1215              |              | - 12.4 ± 4.27 | hypothetical protein                               |
| PA1216              |              | - 57.1 ± 15.3 | hypothetical protein                               |
| PA1217              |              | - 39.5 ± 11.6 | probable 2-isopropylmalate synthase                |
| PA1218              |              | - 18.4 ± 3.82 | hypothetical protein                               |
| PA1219              |              | - 5.39 ± 1.41 | hypothetical protein                               |
| PA1220              |              | - 7.44 ± 2.56 | hypothetical protein                               |
| PA1221              |              | - 8.50 ± 3.40 | hypothetical protein                               |
| PA1323              |              | - 3.27 ± 0.91 | hypothetical protein                               |
| PA1324              |              | - 3.60 ± 0.61 | hypothetical protein                               |
| PA1332              |              | 2.83 ± 0.32   | hypothetical protein                               |
| PA1333              |              | 6.23 ± 2.45   | hypothetical protein                               |
| PA1404              |              | - 3.89 ± 1.28 | hypothetical protein                               |
| PA1743              |              | 2.52 ± 0.30   | hypothetical protein                               |
| PA1744              |              | 3.17 ± 0.93   | hypothetical protein                               |
| PA1784              |              | - 3.38 ± 0.67 | hypothetical protein                               |
| PA1800              | <i>tig</i>   | 2.32 ± 0.20   | trigger factor                                     |
| PA1869              |              | - 9.21 ± 2.77 | probable acyl carrier protein                      |
| PA1871              | <i>lasA</i>  | - 9.94 ± 1.45 | protease                                           |
| PA1874              |              | - 6.09 ± 0.82 | hypothetical protein                               |
| PA1875              |              | - 5.06 ± 1.93 | probable outer membrane protein                    |
| PA1876              |              | - 4.10 ± 1.15 | probable ATP-binding fusion ABC transporter        |
| PA1877              |              | - 3.32 ± 0.82 | probable secretion protein                         |
| PA1888              |              | - 2.27 ± 0.24 | hypothetical protein                               |
| PA1892              |              | - 2.08 ± 0.09 | hypothetical protein                               |
| PA1894              |              | - 5.77 ± 0.95 | hypothetical protein                               |
| PA1895              |              | - 3.86 ± 0.40 | hypothetical protein                               |
| PA1896              |              | - 3.09 ± 0.53 | hypothetical protein                               |
| PA1897              |              | - 4.16 ± 0.75 | hypothetical protein                               |
| PA1901 <sup>a</sup> | <i>phzC2</i> | - 30.7 ± 9.04 | phenazine biosynthesis                             |
| PA1902 <sup>a</sup> | <i>phzD2</i> | - 27.5 ± 4.87 | phenazine biosynthesis                             |
| PA1903 <sup>a</sup> | <i>phzE2</i> | - 45.7 ± 9.59 | phenazine biosynthesis                             |
| PA1904 <sup>a</sup> | <i>phzF2</i> | - 46.8 ± 12.3 | phenazine biosynthesis                             |
| PA1905 <sup>a</sup> | <i>phzG2</i> | - 58.6 ± 7.83 | phenazine biosynthesis                             |
| PA1914              |              | - 18.8 ± 4.97 | hypothetical protein                               |



|        |              |               |                                                                             |
|--------|--------------|---------------|-----------------------------------------------------------------------------|
| PA1927 | <i>metE</i>  | - 25.7 ± 2.09 | methionine synthase                                                         |
| PA1930 |              | - 2.75 ± 0.69 | probable chemotaxis transducer                                              |
| PA1970 |              | 45.6 ± 18.9   | hypothetical protein                                                        |
| PA1978 | <i>erbR</i>  | 2.92 ± 0.71   | response regulator                                                          |
| PA1983 | <i>exaB</i>  | 8.73 ± 1.78   | cytochrome c550                                                             |
| PA2000 | <i>dhcB</i>  | - 2.30 ± 0.15 | dehydrocarnitine CoA transferase                                            |
| PA2014 | <i>liuB</i>  | - 2.48 ± 0.37 | methylcrotonyl-CoA carboxylase                                              |
| PA2015 | <i>liuA</i>  | - 2.36 ± 0.18 | putative isovaleryl-CoA dehydrogenase                                       |
| PA2017 |              | 2.72 ± 0.54   | hypothetical protein                                                        |
| PA2021 |              | - 3.76 ± 0.72 | hypothetical protein                                                        |
| PA2066 |              | - 3.38 ± 0.71 | hypothetical protein                                                        |
| PA2067 |              | - 5.56 ± 1.09 | probable hydrolase                                                          |
| PA2068 |              | - 6.10 ± 2.06 | probable major facilitator superfamily transporter                          |
| PA2069 |              | - 11.2 ± 3.88 | probable carbamoyl transferase                                              |
| PA2110 |              | - 5.06 ± 1.27 | hypothetical protein                                                        |
| PA2111 |              | - 4.06 ± 0.47 | hypothetical protein                                                        |
| PA2112 |              | - 4.24 ± 1.41 | hypothetical protein                                                        |
| PA2114 |              | - 4.41 ± 1.20 | probable major facilitator superfamily transporter                          |
| PA2116 |              | - 5.03 ± 0.64 | hypothetical protein                                                        |
| PA2143 |              | - 3.06 ± 0.66 | hypothetical protein                                                        |
| PA2166 |              | - 7.16 ± 2.23 | hypothetical protein                                                        |
| PA2170 |              | - 2.84 ± 1.31 | hypothetical protein                                                        |
| PA2171 |              | - 4.29 ± 0.68 | hypothetical protein                                                        |
| PA2176 |              | - 2.92 ± 0.30 | hypothetical protein                                                        |
| PA2193 | <i>hcnA</i>  | - 38.2 ± 5.10 | hydrogen cyanide synthase                                                   |
| PA2194 | <i>hcnB</i>  | - 11.9 ± 4.02 | hydrogen cyanide synthase                                                   |
| PA2195 | <i>hcnC</i>  | - 9.10 ± 2.19 | hydrogen cyanide synthase                                                   |
| PA2204 |              | - 2.55 ± 0.50 | probable binding protein component of ABC transporter                       |
| PA2232 | <i>pslB</i>  | - 2.44 ± 0.23 | mannose-1-phosphate<br>guanylyltransferase/mannose-6-phosphate<br>isomerase |
| PA2234 | <i>pslD</i>  | - 2.19 ± 0.19 | protein involved in polysaccharide export                                   |
| PA2235 | <i>pslE</i>  | - 2.36 ± 0.27 | protein involved in exopolysaccharide biosynthesis                          |
| PA2240 | <i>pslJ</i>  | - 2.45 ± 0.33 | protein involved in exopolysaccharide biosynthesis                          |
| PA2274 |              | - 10.8 ± 2.48 | hypothetical protein                                                        |
| PA2300 | <i>chiC</i>  | - 3.35 ± 0.70 | chitinase                                                                   |
| PA2317 |              | 5.43 ± 0.58   | probable oxidoreductase                                                     |
| PA2318 |              | 5.19 ± 1.48   | hypothetical protein                                                        |
| PA2384 |              | - 4.08 ± 0.84 | hypothetical protein                                                        |
| PA2405 |              | - 2.59 ± 0.55 | hypothetical protein                                                        |
| PA2414 |              | - 2.85 ± 0.66 | L-sorbose dehydrogenase                                                     |
| PA2415 |              | - 2.56 ± 0.29 | hypothetical protein                                                        |
| PA2433 |              | - 5.00 ± 1.12 | hypothetical protein                                                        |
| PA2442 | <i>gcvT2</i> | - 12.6 ± 2.34 | glycine cleavage system protein T2                                          |
| PA2443 | <i>sdaA</i>  | - 11.7 ± 1.32 | L-serine dehydratase                                                        |
| PA2444 | <i>glyA2</i> | - 54.4 ± 6.04 | serine hydroxymethyltransferase                                             |
| PA2445 | <i>gcvP2</i> | - 37.5 ± 4.58 | glycine cleavage system protein P2                                          |
| PA2446 | <i>gcvH2</i> | - 59.3 ± 25.1 | glycine cleavage system protein H2                                          |
| PA2486 |              | 14.9 ± 8.70   | hypothetical protein                                                        |
| PA2491 | <i>mexS</i>  | 12.4 ± 4.20   | probable oxidoreductase                                                     |

|        |              |               |                                                            |
|--------|--------------|---------------|------------------------------------------------------------|
| PA2493 | <i>mexE</i>  | 139 ± 16.6    | multidrug efflux membrane fusion protein                   |
| PA2494 | <i>mexF</i>  | 115 ± 16.5    | multidrug efflux transporter                               |
| PA2495 | <i>oprN</i>  | 43.1 ± 8.70   | multidrug efflux outer membrane protein                    |
| PA2564 |              | - 4.60 ± 0.83 | hypothetical protein                                       |
| PA2565 |              | - 4.97 ± 0.85 | hypothetical protein                                       |
| PA2566 |              | - 7.10 ± 1.29 | hypothetical protein                                       |
| PA2570 | <i>lecA</i>  | - 26.0 ± 6.95 | PA-IL lectin                                               |
| PA2588 |              | - 2.99 ± 0.49 | probable transcriptional regulator                         |
| PA2592 |              | - 3.02 ± 0.85 | probable periplasmic spermidine/putrescine-binding protein |
| PA2635 |              | 3.03 ± 0.52   | hypothetical protein                                       |
| PA2747 |              | - 17.6 ± 9.28 | hypothetical protein                                       |
| PA2754 |              | - 4.32 ± 1.52 | hypothetical protein                                       |
| PA2759 |              | 16.3 ± 1.93   | hypothetical protein                                       |
| PA2788 |              | - 2.70 ± 0.38 | probable chemotaxis transducer                             |
| PA2811 |              | 6.43 ± 1.05   | probable permease of ABC-2 transporter                     |
| PA2812 |              | 5.07 ± 0.72   | probable ATP-binding component of ABC transporter          |
| PA2813 |              | 6.26 ± 0.37   | probable glutathione S-transferase                         |
| PA2939 |              | - 3.84 ± 0.42 | probable aminopeptidase                                    |
| PA3023 |              | - 2.43 ± 0.32 | hypothetical protein                                       |
| PA3032 | <i>snr1</i>  | - 3.71 ± 0.58 | cytochrome c Snr1                                          |
| PA3041 |              | - 2.47 ± 0.40 | hypothetical protein                                       |
| PA3229 |              | 124 ± 17.2    | hypothetical protein                                       |
| PA3258 |              | 2.47 ± 0.27   | hypothetical protein                                       |
| PA3273 |              | - 2.62 ± 0.55 | hypothetical protein                                       |
| PA3296 | <i>phoA</i>  | 2.83 ± 0.32   | alkaline phosphatase                                       |
| PA3319 | <i>plcN</i>  | 4.01 ± 0.22   | non-hemolytic phospholipase C                              |
| PA3326 | <i>clpP2</i> | - 7.84 ± 1.12 | ATP-dependent Clp protease                                 |
| PA3327 |              | - 4.08 ± 0.89 | probable non-ribosomal peptide synthetase                  |
| PA3328 |              | - 6.40 ± 1.91 | probable FAD-dependent monooxygenase                       |
| PA3329 |              | - 7.12 ± 1.84 | hypothetical protein                                       |
| PA3330 |              | - 7.06 ± 1.67 | probable short chain dehydrogenase                         |
| PA3331 |              | - 18.6 ± 4.04 | cytochrome P450                                            |
| PA3332 |              | - 12.5 ± 3.82 | hypothetical protein                                       |
| PA3333 | <i>fabH2</i> | - 9.48 ± 1.78 | 3-oxoacyl-acyl-carrier-protein synthase III                |
| PA3334 |              | - 17.6 ± 5.50 | probable acyl carrier protein                              |
| PA3335 |              | - 6.48 ± 0.96 | hypothetical protein                                       |
| PA3336 |              | - 4.77 ± 0.94 | probable major facilitator superfamily transporter         |
| PA3361 | <i>lecB</i>  | - 34.5 ± 7.81 | fucose-binding lectin PA-IIL                               |
| PA3362 |              | - 3.67 ± 0.88 | hypothetical protein                                       |
| PA3363 | <i>amiR</i>  | - 6.70 ± 1.97 | aliphatic amidase regulator                                |
| PA3364 | <i>amiC</i>  | - 4.52 ± 0.90 | aliphatic amidase expression-regulating protein            |
| PA3365 |              | - 12.0 ± 2.18 | probable chaperone                                         |
| PA3366 | <i>amiE</i>  | - 8.70 ± 1.67 | aliphatic amidase                                          |
| PA3397 | <i>fpr</i>   | - 3.08 ± 1.09 | ferredoxin reductase                                       |
| PA3465 |              | - 2.33 ± 0.31 | hypothetical protein                                       |
| PA3476 | <i>rhIL</i>  | - 3.59 ± 1.28 | autoinducer synthesis protein                              |
| PA3478 | <i>rhIB</i>  | - 27.4 ± 3.70 | rhamnosyltransferase chain B                               |
| PA3479 | <i>rhIA</i>  | - 38.4 ± 6.35 | rhamnosyltransferase chain A                               |
| PA3520 |              | - 6.35 ± 2.78 | hypothetical protein                                       |

|                     |              |               |                                                                    |
|---------------------|--------------|---------------|--------------------------------------------------------------------|
| PA3568              |              | - 4.01 ± 0.46 | probable acetyl-CoA synthetase                                     |
| PA3569              | <i>mmsB</i>  | - 3.42 ± 0.40 | 3-hydroxyisobutyrate dehydrogenase                                 |
| PA3570              | <i>mmsA</i>  | - 2.86 ± 0.42 | methylmalonate-semialdehyde dehydrogenase                          |
| PA3602              |              | 2.22 ± 0.18   | hypothetical protein                                               |
| PA3629              | <i>adhC</i>  | 2.42 ± 0.32   | alcohol dehydrogenase                                              |
| PA3691              |              | - 5.02 ± 1.05 | hypothetical protein                                               |
| PA3692              | <i>lptF</i>  | - 5.42 ± 1.40 | lipotoxon F                                                        |
| PA3710              |              | - 3.38 ± 0.41 | probable GMC-type oxidoreductase                                   |
| PA3724              | <i>lasB</i>  | - 17.7 ± 2.69 | elastase                                                           |
| PA3734              |              | - 5.96 ± 1.88 | hypothetical protein                                               |
| PA3788              |              | - 2.77 ± 0.39 | hypothetical protein                                               |
| PA3925              |              | 2.40 ± 0.26   | probable acyl-CoA thiolase                                         |
| PA4070              |              | 2.86 ± 0.69   | probable transcriptional regulator                                 |
| PA4072              |              | 4.87 ± 0.78   | probable amino acid permease                                       |
| PA4073              |              | 6.20 ± 1.53   | probable aldehyde dehydrogenase                                    |
| PA4078              |              | - 3.09 ± 0.67 | probable nonribosomal peptide synthetase                           |
| PA4091              | <i>hpaA</i>  | 6.97 ± 2.00   | 4-hydroxyphenylacetate 3-monooxygenase                             |
| PA4092              | <i>hpaC</i>  | 5.35 ± 1.11   | 4-hydroxyphenylacetate 3-monooxygenase                             |
| PA4100              |              | 2.95 ± 0.79   | probable dehydrogenase                                             |
| PA4121              |              | 18.0 ± 3.21   | hypothetical protein                                               |
| PA4122              |              | 7.80 ± 1.28   | hypothetical protein                                               |
| PA4123              | <i>hpcC</i>  | 12.9 ± 2.34   | 5-carboxy-2-hydroxymuconate semialdehyde dehydrogenase             |
| PA4124              | <i>hpcB</i>  | 6.39 ± 1.30   | homoprotocatechuate 2,3-dioxygenase                                |
| PA4125              | <i>hpcD</i>  | 10.9 ± 1.11   | 5-carboxymethyl-2-hydroxymuconate isomerase                        |
| PA4126              |              | 2.84 ± 0.86   | probable major facilitator superfamily transporter                 |
| PA4127              | <i>hpcG</i>  | 3.54 ± 0.94   | 2-oxo-hept-3-ene-1,7-dioate hydratase                              |
| PA4128              |              | 3.15 ± 0.61   | hypothetical protein                                               |
| PA4129              |              | - 11.3 ± 1.30 | hypothetical protein                                               |
| PA4130              |              | - 16.1 ± 4.16 | probable sulfite or nitrite reductase                              |
| PA4131              |              | - 21.0 ± 4.91 | probable iron-sulfur protein                                       |
| PA4132              |              | - 6.31 ± 0.91 | conserved hypothetical protein                                     |
| PA4133              |              | - 9.05 ± 2.30 | cytochrome c oxidase                                               |
| PA4134              |              | - 3.89 ± 0.50 | hypothetical protein                                               |
| PA4141              |              | - 31.4 ± 6.26 | hypothetical protein                                               |
| PA4175              | <i>piv</i>   | - 4.68 ± 0.65 | protease IV                                                        |
| PA4205              | <i>mexG</i>  | - 18.2 ± 4.98 | hypothetical protein                                               |
| PA4206              | <i>mexH</i>  | - 15.6 ± 3.45 | resistance-nodulation-dell division efflux membrane fusion protein |
| PA4207              | <i>mexI</i>  | - 15.0 ± 1.15 | resistance-nodulation-dell division efflux transporter             |
| PA4208              | <i>opmD</i>  | - 11.5 ± 2.34 | probable outer membrane protein                                    |
| PA4209              | <i>phzM</i>  | - 22.7 ± 2.79 | phenazine-specific methyltransferase                               |
| PA4210 <sup>a</sup> | <i>phzA1</i> | - 24.3 ± 4.69 | phenazine biosynthesis protein                                     |
| PA4211 <sup>a</sup> | <i>phzB1</i> | - 113 ± 16.8  | phenazine biosynthesis protein                                     |
| PA4217              | <i>phzS</i>  | - 68.9 ± 8.75 | flavin-containing monooxygenase                                    |
| PA4218              | <i>ampP</i>  | 3.25 ± 0.51   | siderophore transporter                                            |
| PA4219              | <i>ampO</i>  | 2.68 ± 0.39   | iron-regulated membrane protein                                    |
| PA4220              |              | 4.08 ± 1.42   | hypothetical protein                                               |
| PA4221              | <i>fptA</i>  | 4.24 ± 0.47   | iron-pyochelin outer membrane receptor                             |
| PA4222              |              | 2.84 ± 0.70   | probable ATP-binding component of ABC                              |

---

|        |              |               |                                                                     |
|--------|--------------|---------------|---------------------------------------------------------------------|
| PA4223 |              | 3.20 ± 0.84   | transporter<br>probable ATP-binding component of ABC<br>transporter |
| PA4224 | <i>pchG</i>  | 3.48 ± 0.64   | pyochelin biosynthesis protein                                      |
| PA4225 | <i>pchF</i>  | 3.85 ± 1.02   | pyochelin synthetase                                                |
| PA4226 | <i>pchE</i>  | 3.92 ± 1.56   | dihydroaeruginic acid synthetase                                    |
| PA4228 | <i>pchD</i>  | 3.50 ± 0.40   | pyochelin biosynthesis protein                                      |
| PA4229 | <i>pchC</i>  | 3.36 ± 1.21   | pyochelin biosynthesis protein                                      |
| PA4230 | <i>pchB</i>  | 2.96 ± 0.47   | salicylate biosynthesis protein                                     |
| PA4231 | <i>pchA</i>  | 2.88 ± 0.64   | isochorismate synthase                                              |
| PA4293 | <i>pprA</i>  | - 3.17 ± 0.64 | two-component sensor                                                |
| PA4294 |              | - 3.84 ± 0.92 | hypothetical protein                                                |
| PA4297 | <i>tadG</i>  | - 2.61 ± 0.43 | probable membrane protein                                           |
| PA4298 |              | - 3.46 ± 1.07 | hypothetical protein                                                |
| PA4299 | <i>tadD</i>  | - 2.74 ± 0.12 | Flp pilus assembly protein                                          |
| PA4300 | <i>tadC</i>  | - 2.60 ± 0.22 | Flp pilus assembly protein                                          |
| PA4301 | <i>tadB</i>  | - 2.55 ± 0.25 | Flp pilus assembly protein                                          |
| PA4302 | <i>tadA</i>  | - 3.03 ± 1.03 | Flp pilus assembly protein                                          |
| PA4303 | <i>tadZ</i>  | - 2.65 ± 0.22 | Flp pilus assembly protein                                          |
| PA4304 | <i>rcpA</i>  | - 2.78 ± 0.71 | Flp pilus assembly protein                                          |
| PA4305 | <i>rcpC</i>  | - 2.77 ± 0.31 | Flp pilus assembly protein                                          |
| PA4306 | <i>flp</i>   | - 3.73 ± 1.63 | Type IVb pilin                                                      |
| PA4311 |              | - 2.29 ± 0.16 | hypothetical protein                                                |
| PA4333 |              | 2.50 ± 0.33   | probable fumarase                                                   |
| PA4354 |              | 7.27 ± 4.43   | hypothetical protein                                                |
| PA4356 | <i>xenB</i>  | 5.84 ± 1.63   | xenobiotic reductase                                                |
| PA4590 | <i>pra</i>   | - 5.13 ± 1.31 | protein activator                                                   |
| PA4623 |              | 19.9 ± 10.1   | hypothetical protein                                                |
| PA4648 | <i>cupE1</i> | - 4.64 ± 1.27 | Pilin subunit                                                       |
| PA4649 | <i>cupE2</i> | - 3.03 ± 0.41 | Pilin subunit                                                       |
| PA4650 | <i>cupE3</i> | - 3.13 ± 0.56 | Pilin subunit                                                       |
| PA4651 | <i>cupE4</i> | - 5.29 ± 1.02 | Pilin assembly chaperone                                            |
| PA4653 | <i>cupE6</i> | - 2.66 ± 0.50 | Adhesin-like protein                                                |
| PA4738 |              | - 12.3 ± 4.18 | hypothetical protein                                                |
| PA4739 |              | - 16.8 ± 4.97 | hypothetical protein                                                |
| PA4781 |              | - 2.35 ± 0.34 | cyclic di-GMP phosphodiesterase                                     |
| PA4844 |              | 2.54 ± 0.37   | probable chemotaxis transducer                                      |
| PA4880 |              | - 5.08 ± 2.64 | probable bacterioferritin                                           |
| PA4881 |              | 109 ± 15.6    | hypothetical protein                                                |
| PA4925 |              | - 3.56 ± 0.75 | hypothetical protein                                                |
| PA5219 |              | - 2.97 ± 0.83 | hypothetical protein                                                |
| PA5220 |              | - 13.6 ± 2.23 | hypothetical protein                                                |
| PA5415 | <i>glyA1</i> | - 10.4 ± 2.36 | serine hydroxymethyltransferase                                     |
| PA5481 |              | - 16.6 ± 2.00 | hypothetical protein                                                |
| PA5482 |              | - 17.6 ± 4.51 | hypothetical protein                                                |
| PA5506 |              | - 12.3 ± 3.58 | hypothetical protein                                                |
| PA5507 |              | - 19.4 ± 4.68 | hypothetical protein                                                |
| PA5508 | <i>pauA7</i> | - 3.62 ± 0.84 | Glutamylpolyamine synthetase                                        |
| PA5509 |              | - 7.28 ± 1.58 | hypothetical protein                                                |
| PA5510 |              | - 2.68 ± 0.42 | probable transporter                                                |

---

## REFERENCES

1. **Jacobs MA, Alwood A, Thaipisuttikul I, Spencer D, Haugen E, Ernst S, Will O, Kaul R, Raymond C, Levy R, Chun-Rong L, Guenther D, Bovee D, Olson MV, Manoil C.** 2003. Comprehensive transposon mutant library of *Pseudomonas aeruginosa*. *Proc. Natl. Acad. Sci. USA* **100**:14339-14344.
2. **Kovach ME, Elzer PH, Hill DS, Robertson GT, Farris MA, Roop RM, 2nd, Peterson KM.** 1995. Four new derivatives of the broad-host-range cloning vector pBBR1MCS, carrying different antibiotic-resistance cassettes. *Gene* **166**:175-176.
3. **Mavrodi DV, Bonsall RF, Delaney SM, Soule MJ, Phillips G, Thomashow LS.** 2001. Functional analysis of genes for biosynthesis of pyocyanin and phenazine-1-carboxamide from *Pseudomonas aeruginosa* PAO1. *J. Bacteriol.* **183**:6454-6465.
